# Supplementary material for: TCRβ Sequencing Reveals Spatial and Temporal Evolution of Clonal CD4 T Cell Responses in a Breach of Tolerance Model of Inflammatory Arthritis
Source: PubMed Central journal article supplement (PMC8110912; doi:10.3389/fimmu.2021.669856), 2021-04-27
Supplement: DataSheet_1.pdf [file DataSheet_1.pdf]

# Sup fig 1

## A) Early Inflamed pLN (HAO)

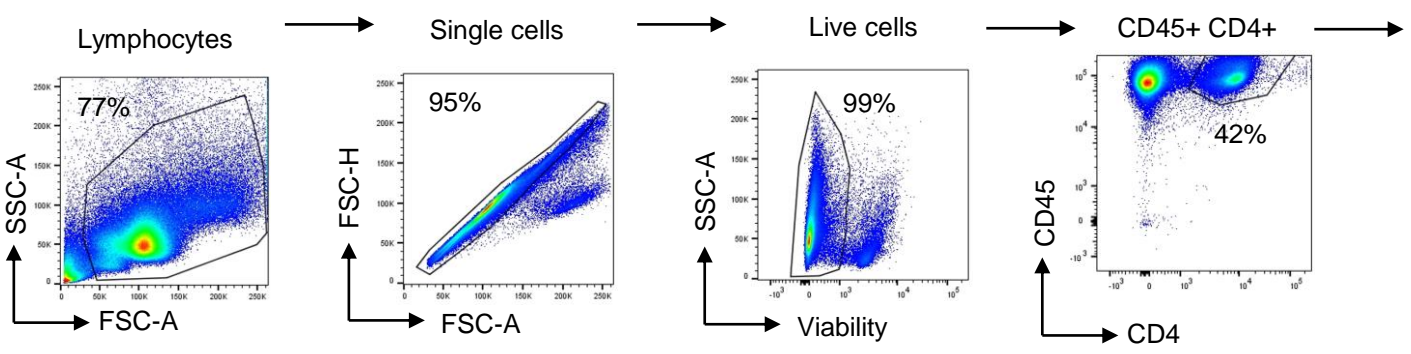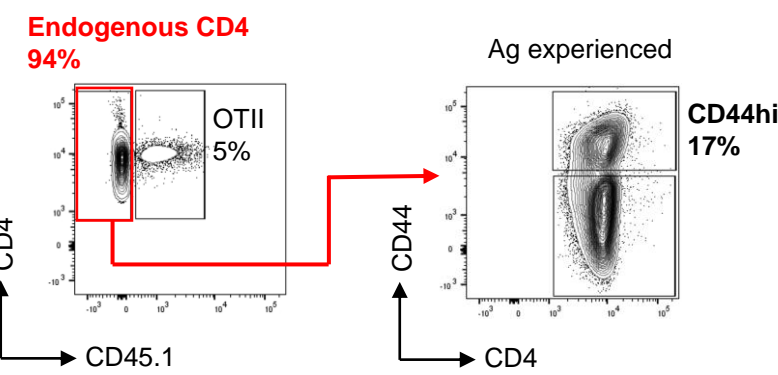

## B) Early Inflamed Joint (HAO)

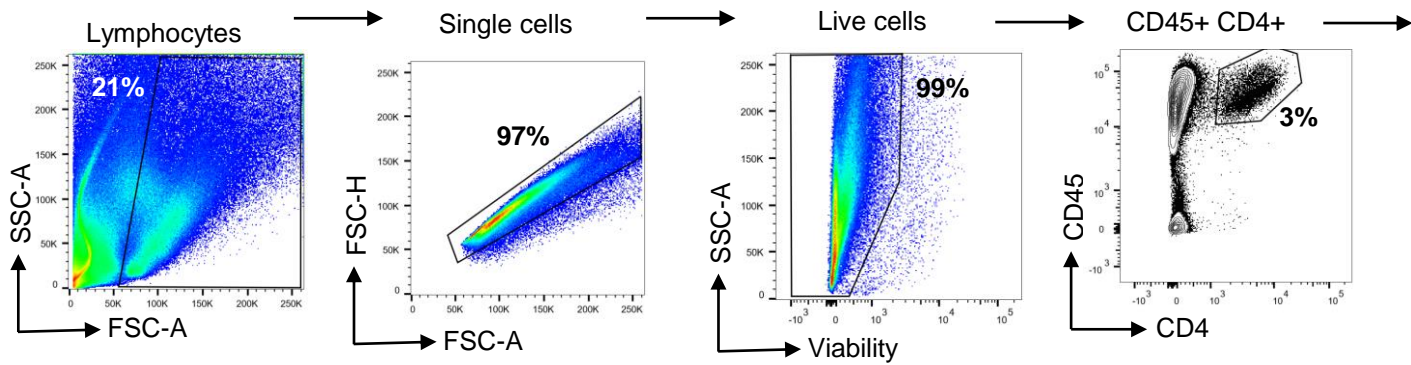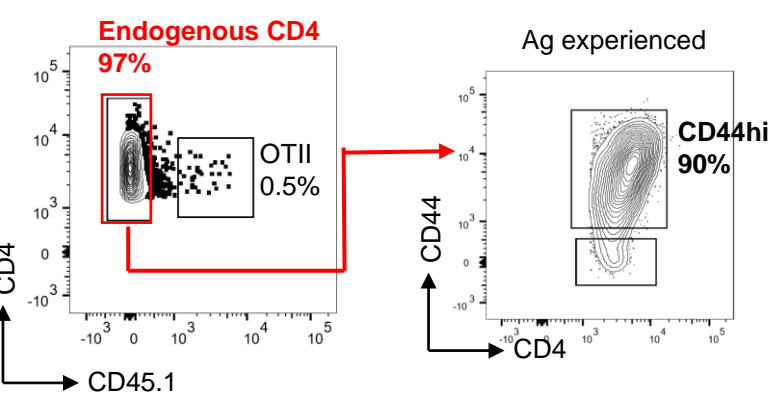

# Sup fig 2

## A) Early control pLN (PBS)

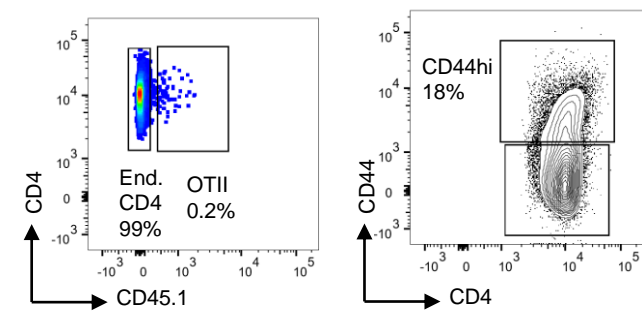

## B) Early control joint (PBS)

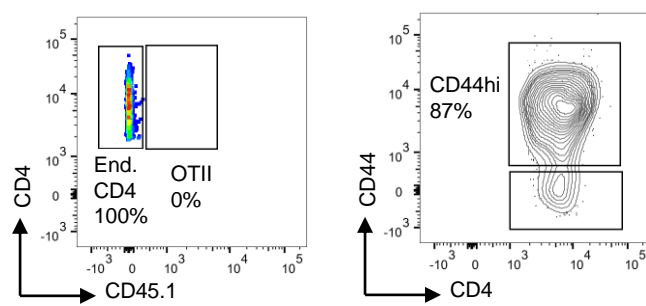

## C) Late control pLN (IFA)

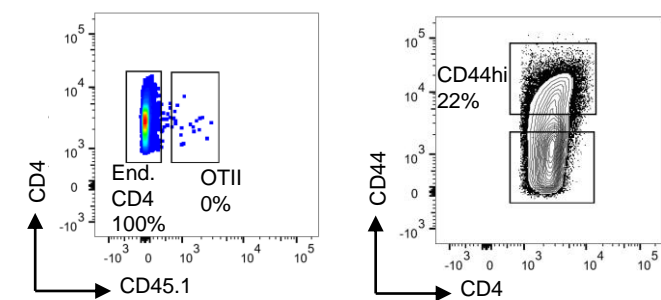

## D) Late control joint (IFA)

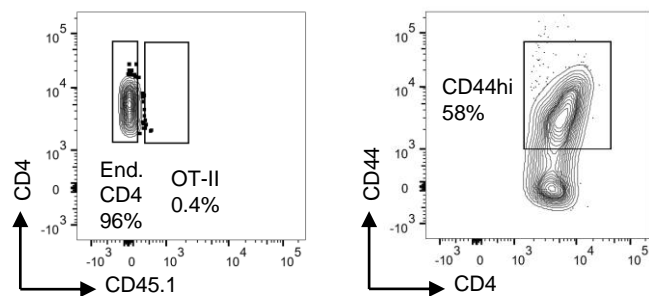

## E) Late inflamed pLN (HAO+IFA)

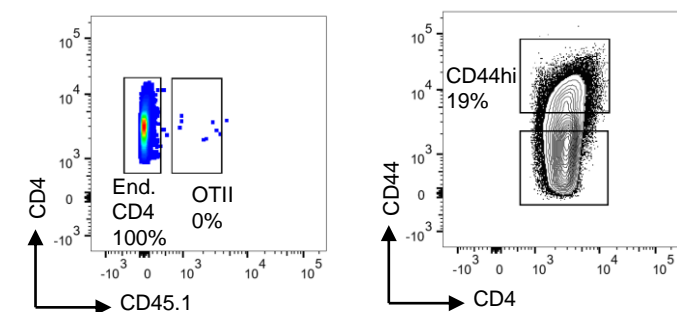

## F) Late inflamed joint (HAO+IFA)

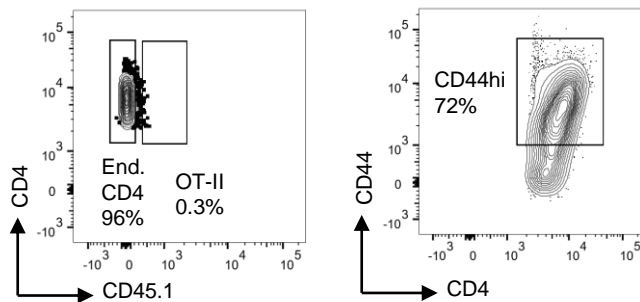

# Sup fig 3

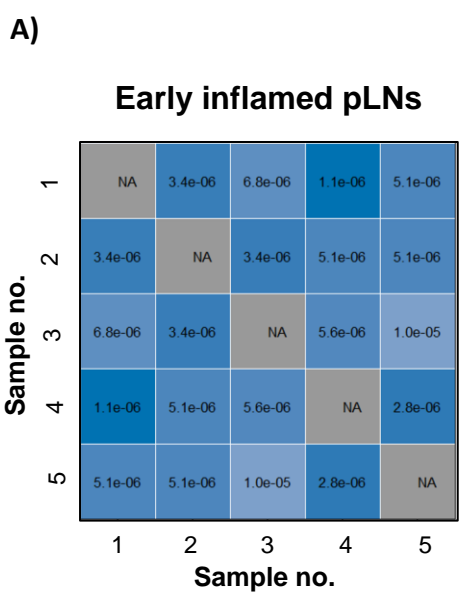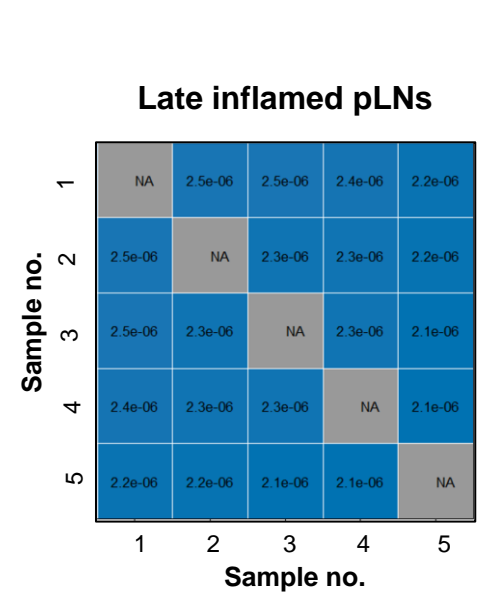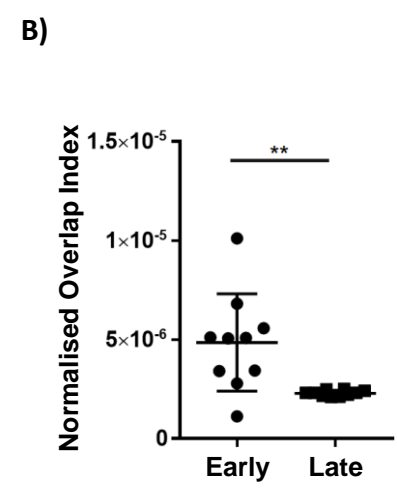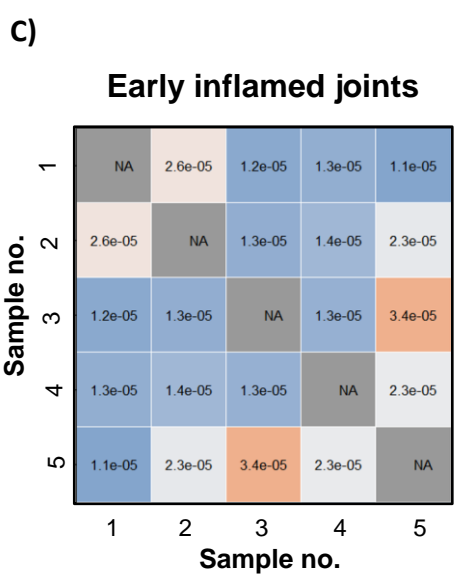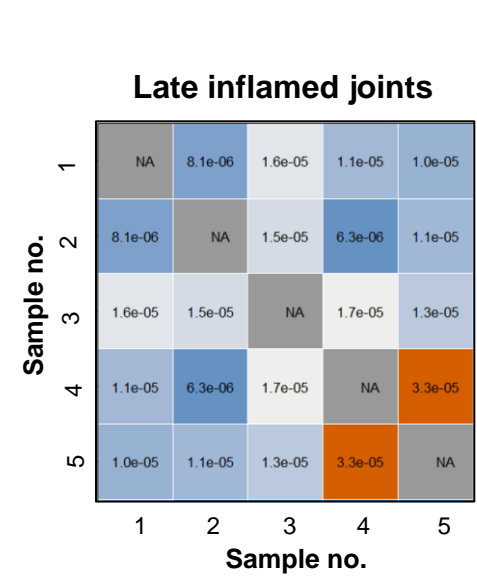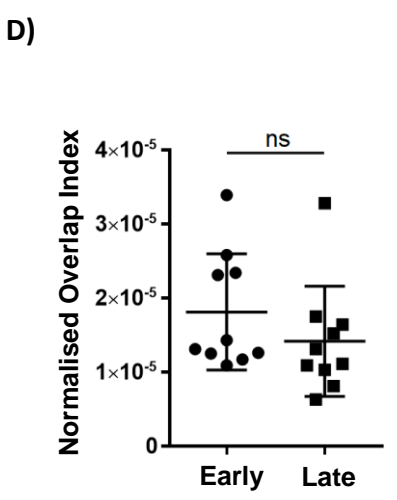

# Sup table 1

| Sample                                 | CDR3 $\beta$ amino acid sequence | V-gene   | Read count in pLN | Rank in pLN | Rank in joint |
|----------------------------------------|----------------------------------|----------|-------------------|-------------|---------------|
| Top 10 early joint 1<br>in early pLN 1 | CASSPGQGTGERLFF                  | TRBV26   | 4276              | 2           | 1             |
|                                        | CASSQTGGSYEQYF                   | TRBV2    | 275               | 95          | 7             |
|                                        | CASSNRDWGQDTQYF                  | TRBV16   | 267               | 98.5        | 3             |
|                                        | CASSFAGHYEQYF                    | TRBV3    | 94                | 196         | 5             |
| Top 10 early joint 2<br>in early pLN 2 | CASSLVGEDTQYF                    | TRBV16   | 1727              | 2           | 9             |
|                                        | CASSPQGNVYAEQFF                  | TRBV2    | 1705              | 3           | 4             |
|                                        | CASSPGGGNYAEQFF                  | TRBV2    | 1384              | 6           | 10            |
|                                        | CASSLVQNTGQLYF                   | TRBV16   | 1004              | 15          | 7             |
|                                        | CASSRTGGNSDYTF                   | TRBV2    | 628               | 39          | 1             |
|                                        | CASSLGAYAEQFF                    | TRBV3    | 616               | 40          | 8             |
|                                        | CASSKLGGLSYEQYF                  | TRBV19   | 340               | 98          | 3             |
| Top 10 early joint 3<br>in early pLN 3 | CASSPLGGRNTGQLYF                 | TRBV5    | 2307              | 2           | 1             |
|                                        | CASSLGGESQNTLYF                  | TRBV12-2 | 1250              | 11          | 8             |
|                                        | CASSNREGTQYF                     | TRBV16   | 753               | 36          | 3             |
|                                        | CGAGQGNTVEVFF                    | TRBV20   | 101               | 193         | 9             |
| Top 10 early joint 4<br>in early pLN 4 | CASSLGGESQNTLYF                  | TRBV12-2 | 14841             | 1           | 2             |
|                                        | CASSQGTGGQDTQYF                  | TRBV2    | 280               | 129         | 3             |
|                                        | CASSFGLEGQNTLYF                  | TRBV3    | 228               | 154         | 1             |
|                                        | CTCSARGSNTVEVFF                  | TRBV1    | 209               | 174         | 6             |
|                                        | CASSPGQGVNTEVFF                  | TRBV4    | 61                | 506         | 8             |
| Top 10 early joint 5<br>in early pLN 5 | CASSQAGGYAEQFF                   | TRBV2    | 631               | 45          | 1             |
|                                        | CASSQTGVNAEQFF                   | TRBV2    | 250               | 153.5       | 5             |
|                                        | CASSQNTGQLYF                     | TRBV16   | 198               | 198.5       | 3             |

# Sup table 2

| Sample                            | CDR3β amino acid sequence | V-gene   | Read count in pLN | Rank in pLN | Rank in joint |
|-----------------------------------|---------------------------|----------|-------------------|-------------|---------------|
| Top 10 late joint 1 in late pLN 1 | CASSLDLGGGRGEQYF          | TRBV16   | 976               | 2           | 7             |
|                                   | CASSQTGGAREQYF            | TRBV2    | 849               | 3           | 3             |
|                                   | CASSRQGNSDYTF             | TRBV12-2 | 807               | 4           | 1             |
|                                   | CASSLSGLGGGAEQFF          | TRBV26   | 764               | 5           | 2             |
|                                   | CASGGSGTGETLYF            | TRBV13-2 | 456               | 7           | 4             |
|                                   | CASSQAQNTVEVFF            | TRBV2    | 330               | 11          | 8             |
|                                   | CASSQTGANTEVFF            | TRBV2    | 153               | 38          | 10            |
|                                   | CASSLSLGGLEQYF            | TRBV26   | 142               | 47          | 5             |
|                                   | CASSSLRGSNQAPLF           | TRBV16   | 95                | 98          | 6             |
| Top 10 late joint 2 in late pLN 2 | CASSFSGQTEVFF             | TRBV14   | 530               | 1           | 1             |
|                                   | CASSWGQGRDQYF             | TRBV16   | 267               | 6           | 3             |
|                                   | CASGDLDKYEQYF             | TRBV13-2 | 167               | 18          | 2             |
|                                   | CTCSTHSDYTF               | TRBV1    | 90                | 69.5        | 7             |
|                                   | CASSQNGALYEQYF            | TRBV2    | 89                | 71.5        | 5             |
|                                   | CASSLQSSAETLYF            | TRBV16   | 85                | 77.5        | 10            |
|                                   | CASQFRQDNIAEQFF           | TRBV14   | 84                | 81          | 9             |
|                                   | CASSPPYINSDYTF            | TRBV3    | 60                | 171         | 4             |
|                                   | CASSQAGGYAEQFF            | TRBV2    | 52                | 226.5       | 6             |
| CASSKGPYNSPLYF                    | TRBV19                    | 26       | 950               | 8           |               |
| Top 10 late joint 3 in late pLN 3 | CASSLETGGASEQYF           | TRBV12-2 | 879               | 1           | 2             |
|                                   | CASRTASGNTLYF             | TRBV19   | 798               | 2           | 4             |
|                                   | CARSTRAYNSPLYF            | TRBV19   | 257               | 7           | 7             |
|                                   | CASSSNTGQLYF              | TRBV16   | 217               | 12          | 1             |
|                                   | CTCSASGFSNERLFF           | TRBV1    | 199               | 16          | 6             |
|                                   | CASSQTGGSYEQYF            | TRBV2    | 164               | 25          | 5             |
|                                   | CASSQDSGGRAEQFF           | TRBV2    | 158               | 31          | 8             |
|                                   | CASGRNYAEQFF              | TRBV13-2 | 134               | 39          | 10            |
|                                   | CASSQDTGGLNTLYF           | TRBV2    | 107               | 51.5        | 3             |
|                                   | CASSQPGTNQAPLF            | TRBV2    | 52                | 197         | 9             |
| Top 10 late joint 4 in late pLN 4 | CASSKPGYAEQFF             | TRBV19   | 435               | 3.5         | 1             |
|                                   | CASSQEAGRNTGQLYF          | TRBV5    | 435               | 3.5         | 10            |
|                                   | CASSQTGAETLYF             | TRBV5    | 260               | 14          | 4             |
|                                   | CASSRGPYNSPLYF            | TRBV19   | 203               | 20          | 7             |
|                                   | CASSQAGGYAEQFF            | TRBV2    | 170               | 26.5        | 2             |
|                                   | CASSSNTGQLYF              | TRBV16   | 109               | 59.5        | 3             |
|                                   | CASSLAGGGYAEQFF           | TRBV3    | 102               | 68          | 5             |
|                                   | CASSFGSSAETLYF            | TRBV29   | 55                | 209.5       | 6             |
|                                   | CASSGQGWSTGQLYF           | TRBV2    | 35                | 528         | 8             |
|                                   | CASSDRASSYEQYF            | TRBV3    | 32                | 621.5       | 9             |
|                                   | CASSSNTGQLYF              | TRBV16   | 6                 | 8460        | 3             |
|                                   | CASSLAGGGYAEQFF           | TRBV3    | 1                 | 30109.5     | 5             |
| Top 10 late joint 5 in late pLN 5 | CASSLAWGGMAEQFF           | TRBV16   | 515               | 3           | 4             |
|                                   | CASSHRLANSYTF             | TRBV14   | 496               | 4           | 1             |
|                                   | CTCSRDRGSGNTLYF           | TRBV1    | 255               | 13          | 3             |
|                                   | CASSNQDTQYF               | TRBV16   | 217               | 19          | 7             |
|                                   | CASSPLGNIAEQFF            | TRBV2    | 196               | 23          | 5             |
|                                   | CASSPPGQNQAPLF            | TRBV2    | 76                | 95.5        | 6             |
|                                   | CASSQMTISNERLFF           | TRBV2    | 76                | 95.5        | 10            |
|                                   | CASSLDGRSQNTLYF           | TRBV16   | 34                | 377         | 8             |
|                                   | CASSQGGQDTQYF             | TRBV2    | 34                | 377         | 9             |
|                                   | CASSQGGQDTQYF             | TRBV2    | 5                 | 10330       | 9             |
|                                   | CASSQGGQDTQYF             | TRBV2    | 3                 | 17765.5     | 9             |
|                                   | CASSQGGQDTQYF             | TRBV2    | 1                 | 39595       | 9             |
